# Supplementary material
Source: publisher figshare collection journal article supplement (https://tandf.figshare.com/ndownloader/files/14669795)
Supplement: Supplementary file 1 [file 14669795]

**Supplemental figures**


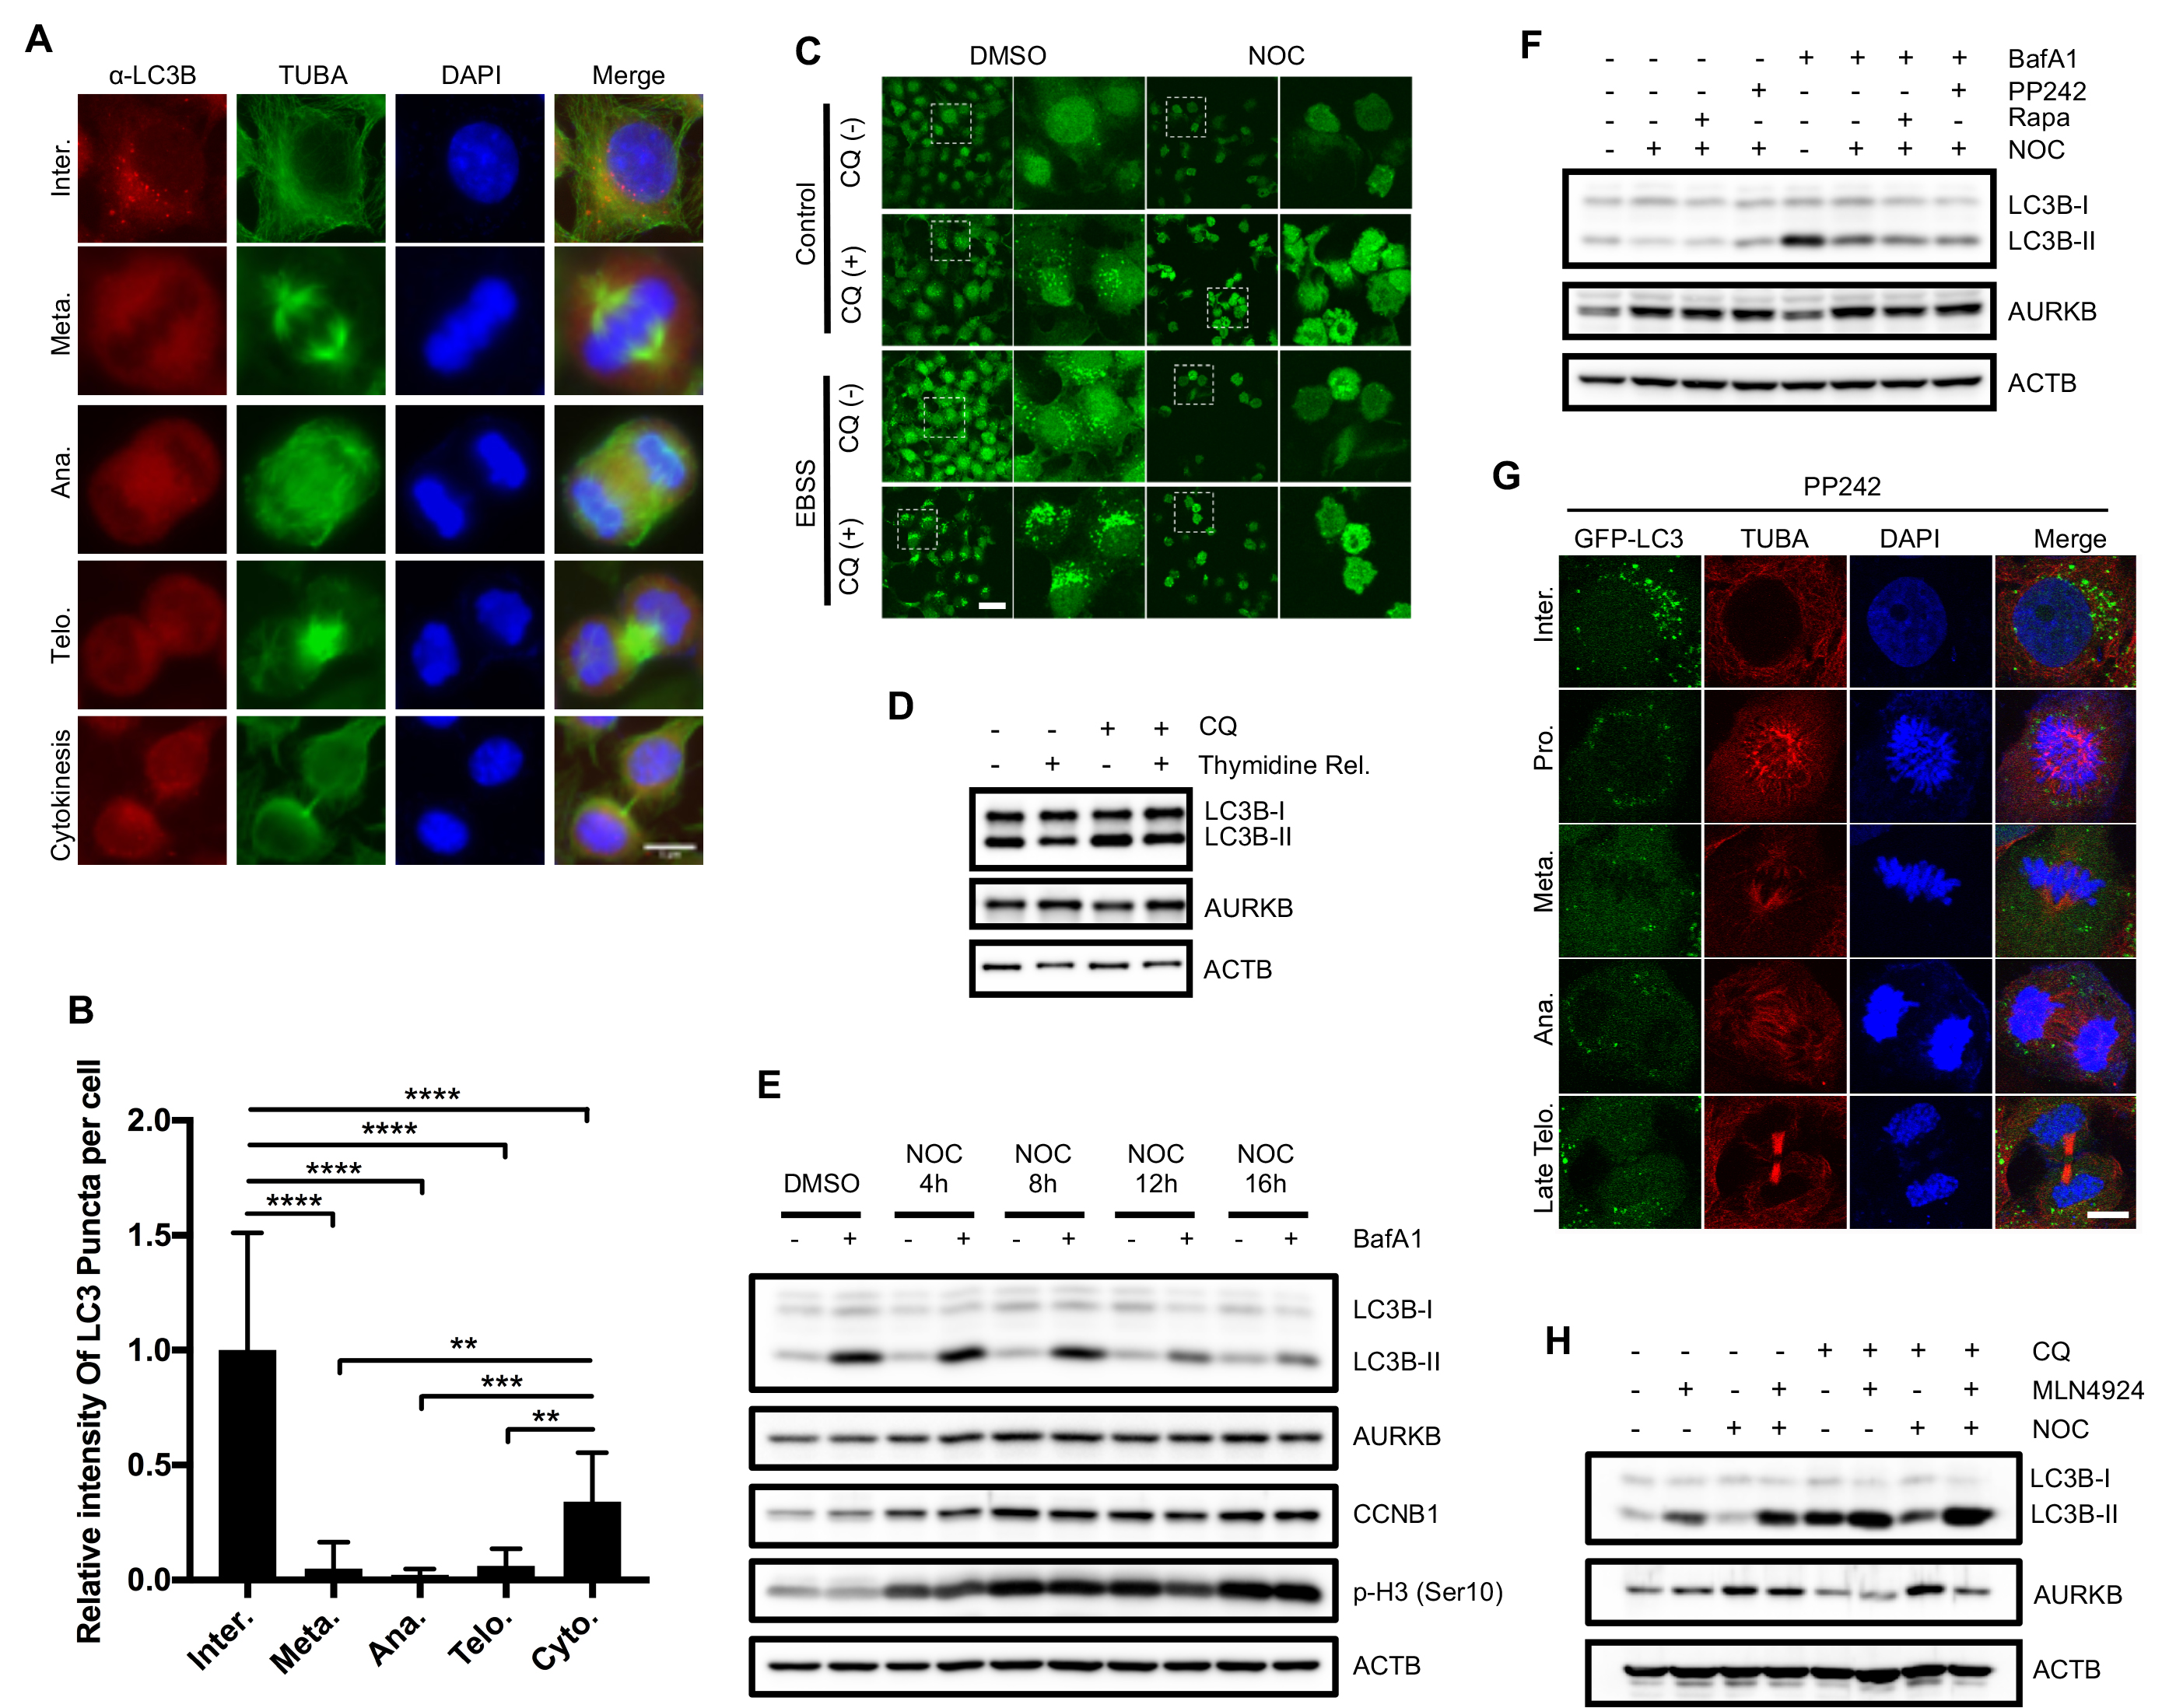


**Figure S1.** Mitotic inhibition of autophagy could be rescued by MLN4924, but not by starvation or mTORC1 inhibitors. (**A**) HeLa cells were fixed with pre-chilled methanol and stained with anti-LC3B antibody. The distribution of LC3 puncta was observed in mitotic cells under microscope.Scale bar: 5 µm. (**B**)Quantification of the intensity of LC3 puncta in cells of different mitotic phases (n=20). The intensity of the cells in interphase was normalized as 1. Columns, mean; Bars, ± S.D. (**, P < 0.01; ***, P < 0.001; ****, P < 0.0001; One Way ANOVA with Dunnett’s multiple comparisons test.) (**C**) HeLa GFP-LC3 stable cells were treated with either DMSO or Nocodazole (NOC, 200 ng/ml) for 16 h. The cells were then subjected to either CQ (25 μM) or CQ (25 μM) plus EBSS starvation for 1.5 h and subsequently imaged with a confocal microscope. Scale bar: 25 µm. (**D**)HeLa cells were synchronized at G1 phase with 2.5 μM thymidine and were then released into fresh medium. Cells were treated with or without CQ (25 μM) at 8 h, harvested at 10 h and subjected to western blot with the indicated antibodies. AURKB was used as a G2/M phase marker. (**E**) HeLa cells were treated with nocodazole (NOC, 200 ng/ml) for the indicated time points. The cells were treated with or without BafA1 (100 nM) for 2 h before being harvested. Whole cell lysates were subjected to western blot analysis. (**F**) HeLa cells were treated with nocodazole (NOC, 200 ng/ml) or NOC plus rapamycin (Rapa) (100 nM) or PP242 (1 μM) for 16 h and then treated with or without BafA1 (100 nM) for 2 h before being harvested. Whole cell lysates were subjected to western blot analysis. (**G**)HeLa-GFP-LC3 cells were treated with PP242 (1 μM) for 18 h and were treated with BafA1 (100 nM) for 2 h before being fixed and stained with anti-TUBA antibody. The number of LC3 puncta in different mitotic phases was analyzed by immunofluorescence analysis. Scale bar: 5 µm. (**H**) HeLa cells were treated with either MLN4924 (1μM), nocodazole (NOC, 200 ng/ml) or NOC (200 ng/ml) plus MLN4924 (1μM) for 16 h. The cells were then treated with or without CQ (25 μM) for 2 h and subjected to western blot analysis.


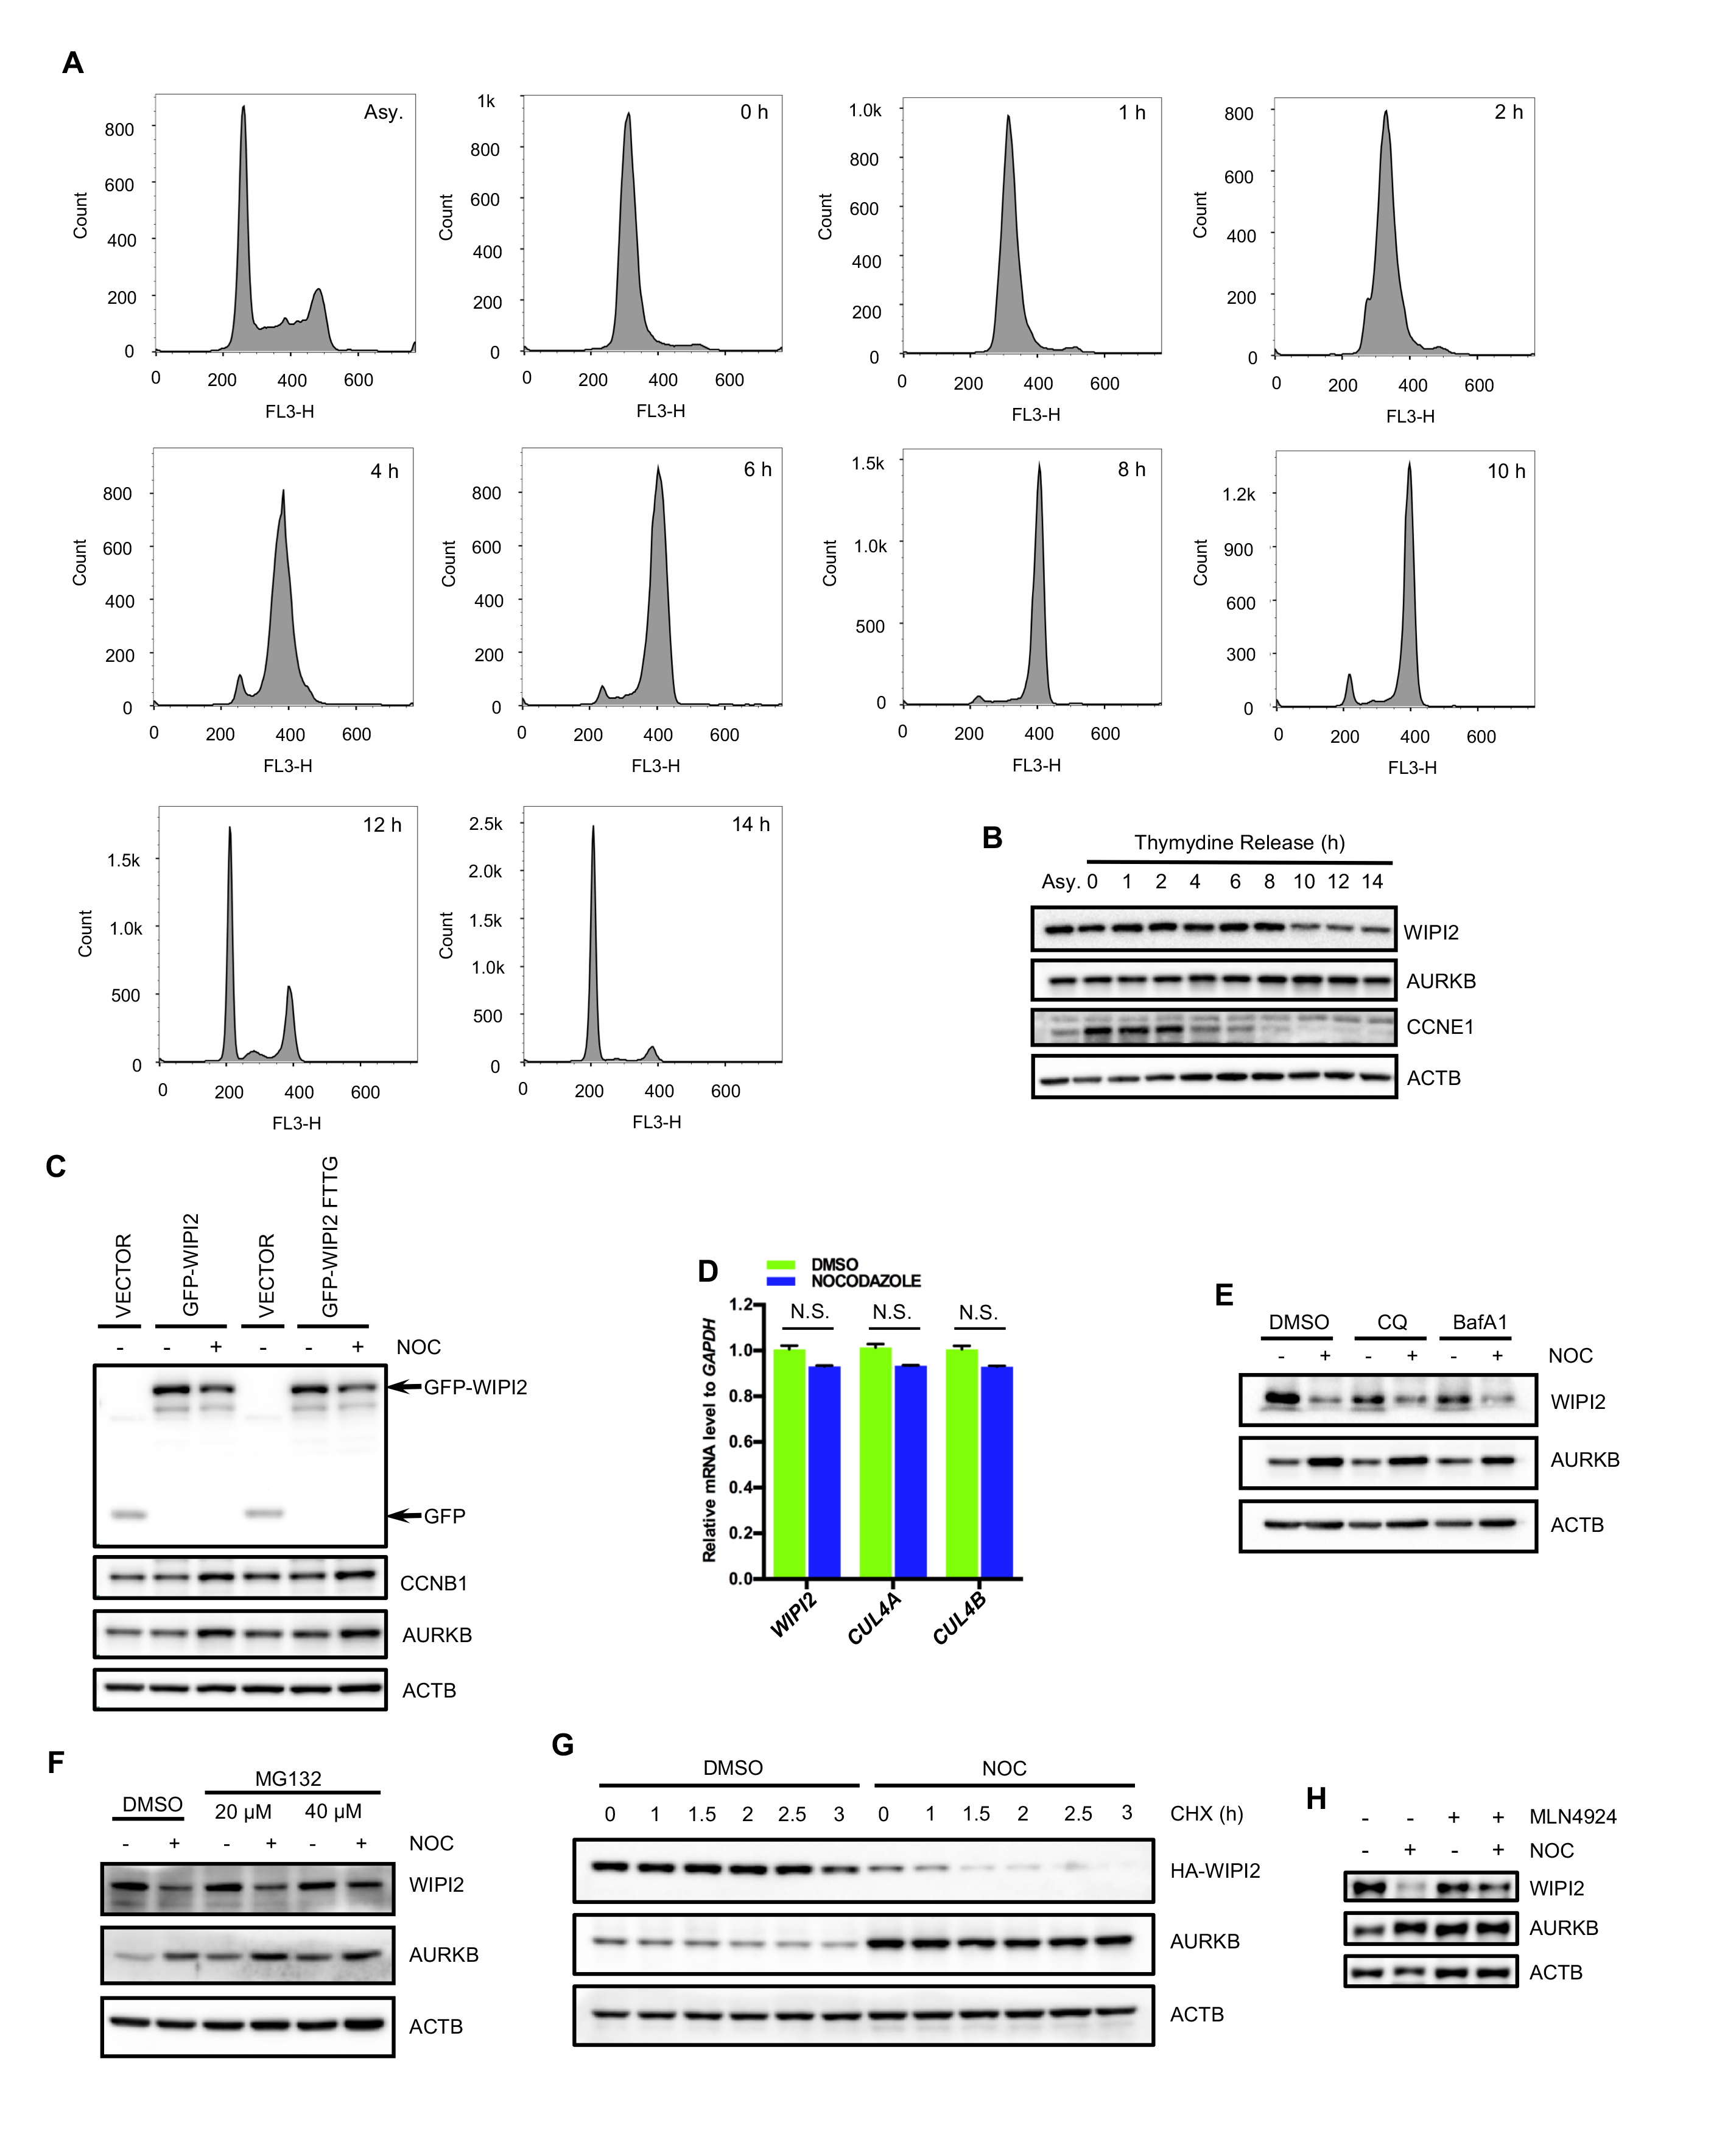


**Figure S2.** WIPI2 is downregulated during mitosis. (**A and B**) HeLa cells were double block with 2.5 μM Thymidine and were then released into fresh medium. Cells were collected at the indicated time points and subjected to FACS (**A**) and western blot analysis with the indicated antibodies (**B**). Asy.: Asychronized cells. AURKB was used as a G2/M phase marker, while CCNE1 (cyclin E1) was used as a G1 phase marker. (**C**)HEK293T cells were transfected with EGFP-C1 empty vector, GFP-WIPI2 or GFP-WIPI2 FTTG mutant for 24 h and were then treated with or without nocodazole (NOC, 200 ng/ml) for 16 h and harvested for western blot analysis. (**D**)Real-time reverse transcription- polymerase chain reaction (RT-PCR) analysis of *WIPI2*, *CUL4A* and *CUL4B* in HeLa cells treated with either DMSO or nocodazole (NOC, 200 ng/ml) for 16 h. The data are presented as means ± SD (n=3). N.S. no significance. The primers for the RT-PCR analysis are listed in Table S2. (**E**) HEK293T cells were treated with nocodazole (NOC, 200 ng/ml) for 16 h. Cells were treated with either chloroquine CQ, 25 µM) or bafilomycin A1 (BafA1, 50 nM) 2 h before being harvested and were subsequently subjected to western blot analysis. (**F**)HEK293T cells were treated with nocodazole (NOC, 200 ng/ml) for 16 h. Cells were then released in fresh medium containing the indicated concentration of MG132 for 1.5 h and were then subjected to western blot analysis. (**G**) HeLa cells stably expressing FLAG-HA-WIPI2 were treated with nocodazole (NOC, 200 ng/ml) for 16 h to arrest the cells in G2/M phase and were subsequently treated with CHX (100 μg/ml) and harvested at the indicated time points. Cells were lysed and subjected to western blot with the indicated antibodies. (**H**) HEK293T cells were treated with either nocodazole (NOC, 200 ng/ml) and/or MLN4924 (1 μM) for 16 h and were harvested for western blot analysis with the indicated antibodies.

**Figure S3.** CRL4s are activated via neddylation during mitosis. (**A**) HEK293T cells were treated with nocodazole (NOC, 200 ng/ml) for 16 h. Cells were then treated with chloroquine (CQ, 25 µM) for 2 h before being harvested and were subsequently subjected to western blot analysis. (**B**) HEK293T cells were treated with either nocodazole (NOC, 200 ng/ml) and/or MLN4924 (1 μM) for 16 h and were harvested for western blot analysis with the indicated antibodies. (**C**) HeLa cells were transfected with siRNA targeting *UBE2M* for 48 h and were treated with either DMSO or nocodazole (NOC, 200 ng/ml) for another 16 h. The cells were then harvested and subjected to western blot analysis.

**Figure S4.** WIPI2 interacts with CRL4s. (**A and B**)HEK293T cells were transfected with either FLAG-CUL4A (**A**) or FLAG-CUL4B (**B**) for 24 h. Cells were lysed with IP lysis buffer and sonication. Whole cell lysates were subjected to FLAG IP, while 5% of the whole cell lysates were loaded as input. (**C and D**)HEK293T cells were transfected with FLAG-CUL4A N440 (**C**) or FLAG-CUL4B N594 (**D**) for 24 h. Cells were lysed with IP lysis buffer and sonication. Whole cell lysates were subjected to FLAG IP, while 5% of the whole cell lysates were loaded as input.(**E and F**)HeLa cells were lysed with IP lysis buffer and sonication. Whole cell lysates were subjected to endogenous immunoprecipitation with anti-DDB1 antibody (**E**) or anti-WIPI2 antibody (**F**). The immunoprecipitates were then analyzed by western blot. SE, short exposure; LE, long exposure.

**Figure S5.** CRL4s negatively regulates WIPI2.(**A and B**)HeLa cells were transfected with FLAG-CUL4A (**A**) and FLAG-CUL4A (**B**) as indicated for 24 h. Cells were then treated with MG132 (10 μM) for 4 h and harvested for western blot analysis with the indicated antibodies. (**C to E**) HeLa cells with stable expression of FLAG-HA-WIPI2 were transfected with V5-CUL4A (**C**), MYC-CUL4B (**D**), or V5-DDB1 (**E**) for 24 h. Cells were subsequently treated with CHX (50 μg/ml) and harvested at the indicated time points, lysed and subjected to western blot with the indicated antibodies.

**Figure S6.** CRL4s targets WIPI2b for ubiquitination *in vivo* and *in vitro*. (**A**) HEK293T cells were transfected with FLAG-WIPI2b for 24 h and were subsequently treated with nocodazole (NOC, 200 ng/ml) for 16 h. The cells were then treated with MG132 (20 μM) for 2 h, lysed with denaturing lysis buffer and subjected to immunoprecipitation with anti-FLAG M2 agarose. (**B**) HeLa cells stably expressing FLAG-HA-WIPI2 was transfected with either control siRNA or siRNA targeting *DDB1* for 48 h. The cells were then treated with or without nocodazole (NOC, 200 ng/ml) for 16 h and released into fresh medium containing MG132 (20 μM) for 1.5 h. The cells were harvested, lysed with RIPA lysis buffer and subjected to immunoprecipitation with anti-FLAG M2 agarose. (**C and D**)GST-WIPI2 protein was purified from BL21 *E. coli* cells. The purified protein was stained with Coomassie Brilliant Blue (**C**) and verified by western blot analysis (**D**).

**
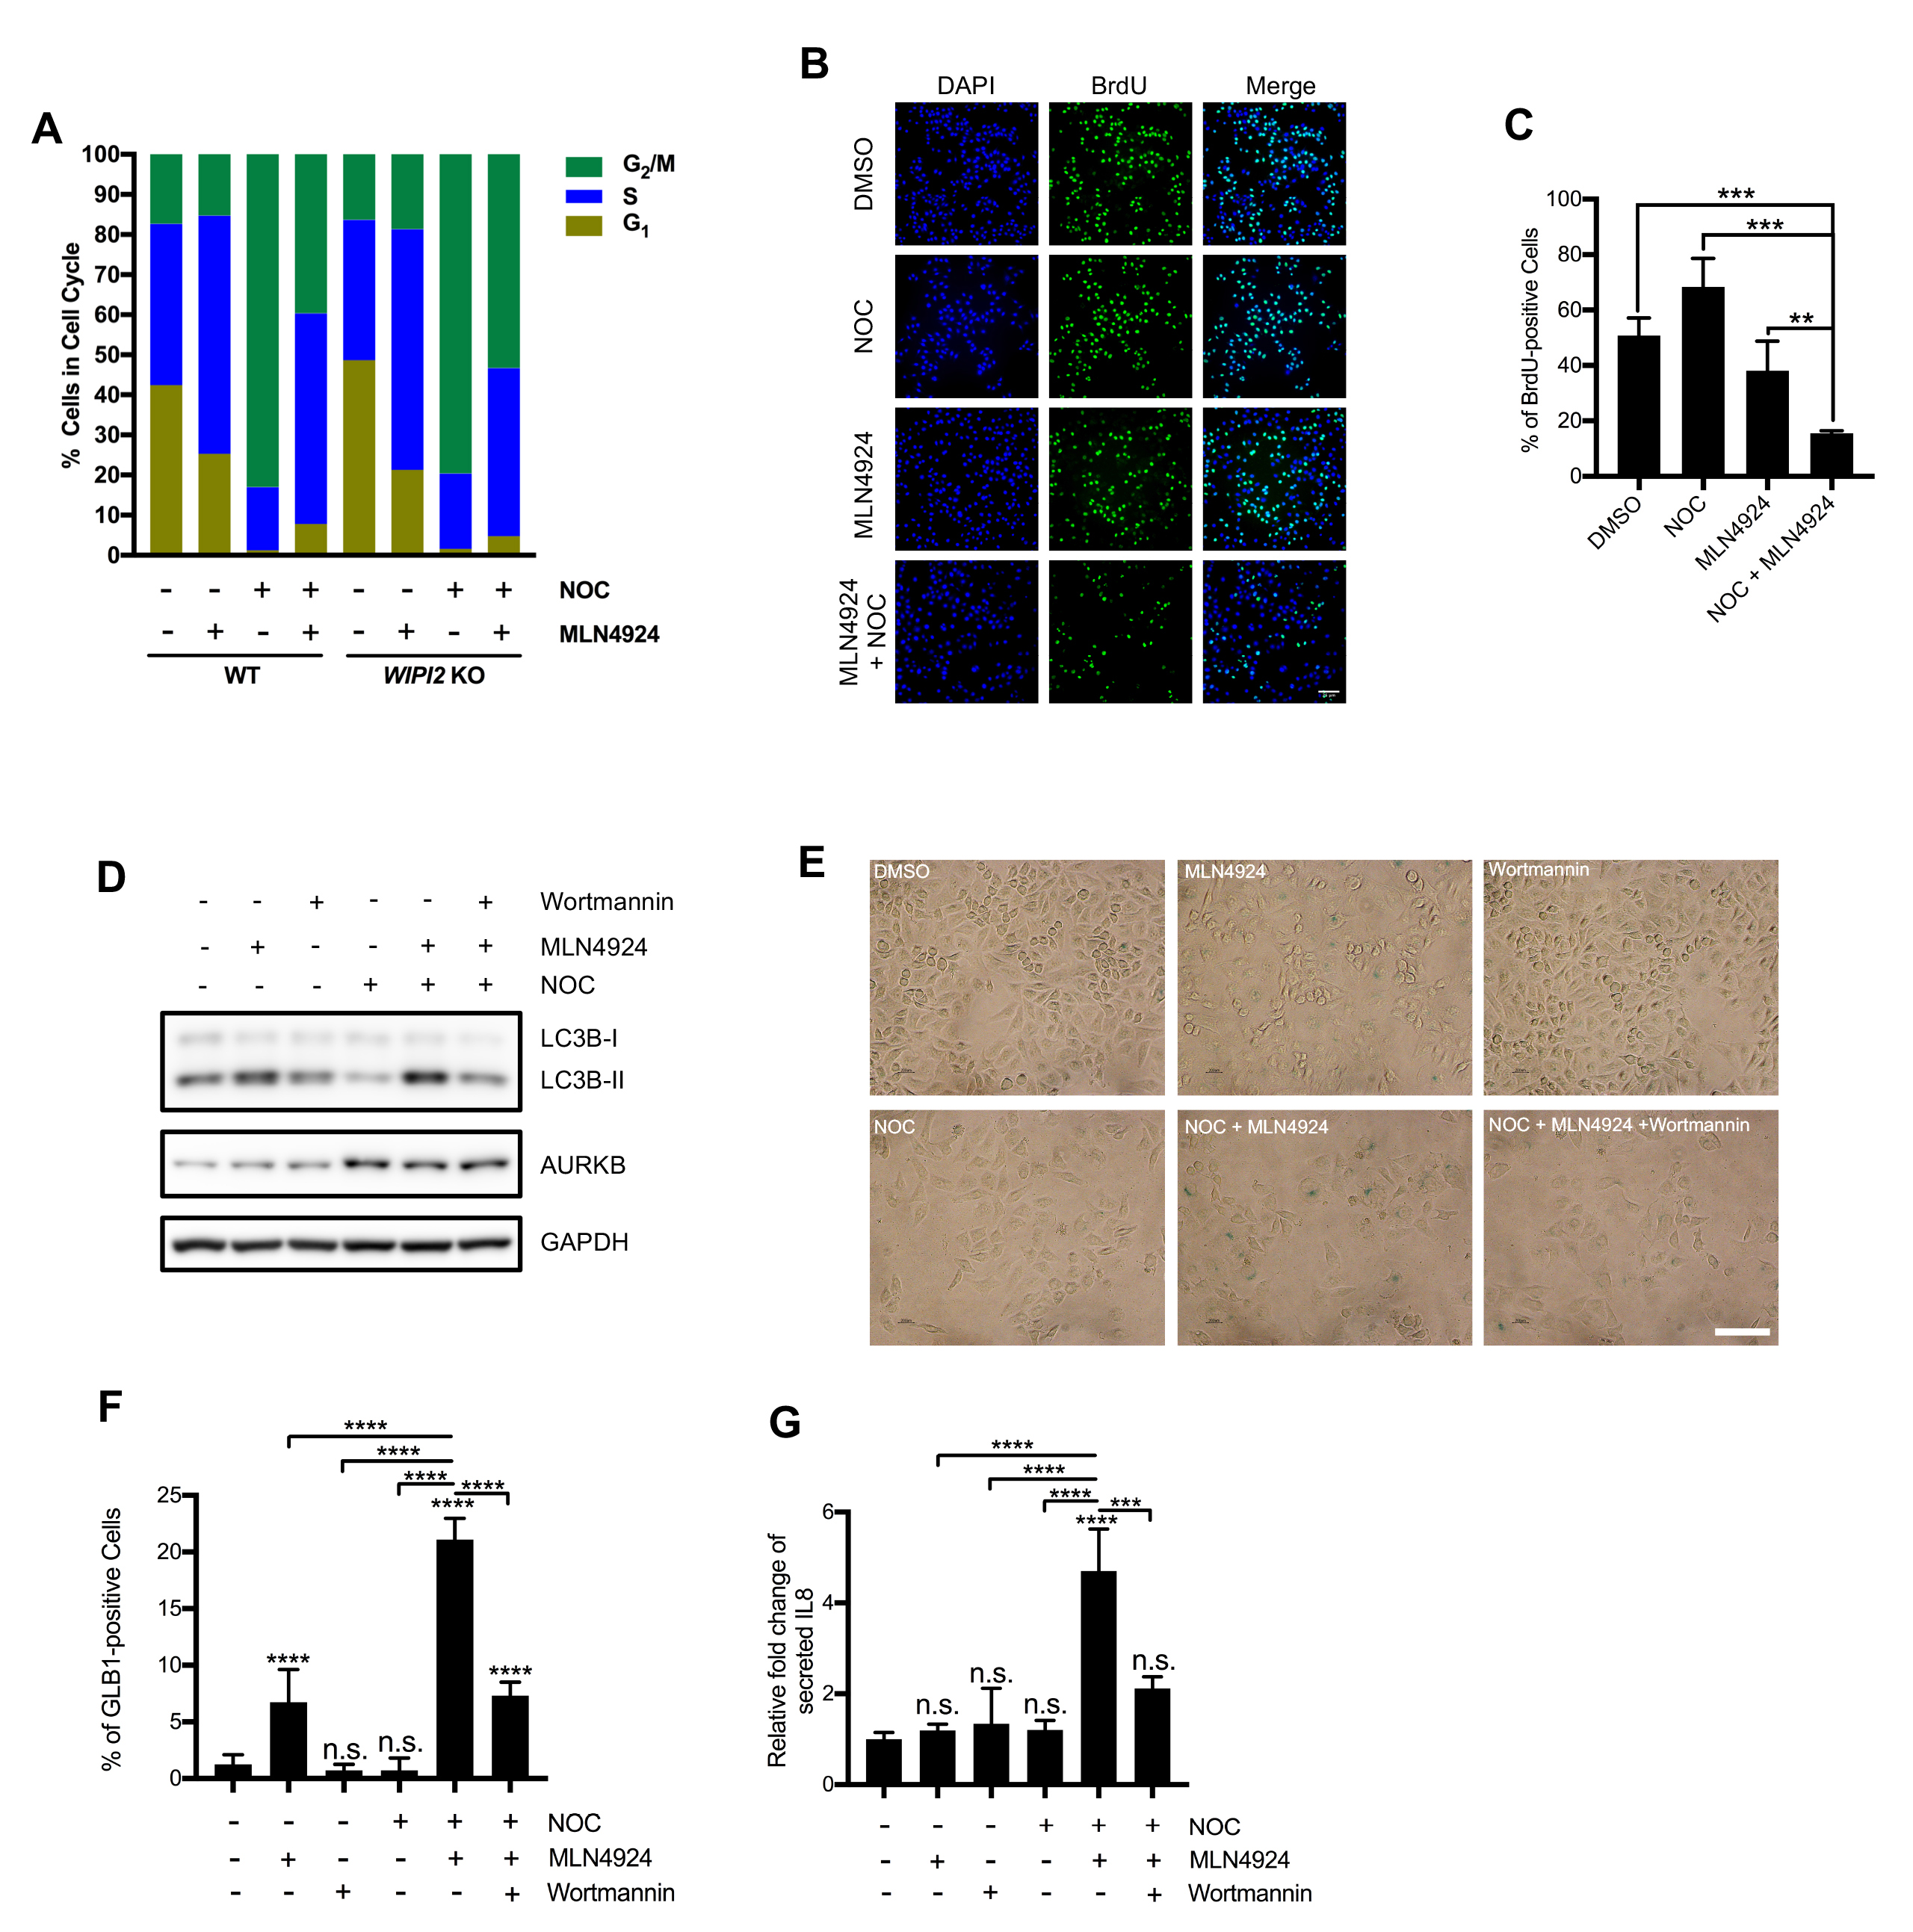
**

**Figure S7.** Reactivation of autophagy during mitosis leads to mitotic slippage and senescence. (**A**) HEK293A wild-type and HEK293A *WIPI2* KO cells were treated with the indicated chemicals (nocodazole, NOC 200 ng/mL, MLN4924 1 µM) for 18 h and subsequently subjected to FACS analysis. Percentages of cells in different phases are presented. Experiments were performed in triplicate. (**B** **and C**) HeLa cells (at the confluency of 30%) were treated with the indicated chemicals (nocodazole, NOC 250 ng/mL, MLN4924 1µM) for 18 hours. Subsequently, the cells were released into fresh medium for 6 h and were subjected to BrdU assay. The cells were then imaged with an immunofluorescence microscope (**B**) and 5 randomly selected areas from each slide were selected to quantify the percentage of BrdU-positive cells in total cells (**C**). Columns, mean; bars, ± S.D. from 3 independent experiments. (n.s., no significance; **, P < 0.01; ***, P < 0.001; one-way ANOVA with Dunnett’s multiple comparisons test.) (**D**)HeLa cells were treated with the indicated chemicals (nocodazole, NOC 250 ng/mL, MLN4924 1 µM, or wortmannin, 1 µM) for 18 h. The cells were then harvested for western blot analysis with the indicated antibodies. (**E and F**)HeLa cells were treated as in D. Subsequently, the cells were re-plated with fresh medium for another 24 h and subjected to SA-GLB1/β-Gal activity analysis; scale bar: 25 μm (**E**). Five randomly selected areas from each slide were selected to quantify the percentage of GLB1/β-Gal-positive cells (**F**). Experiments were performed in triplicate. Columns, mean; bars, ± S.D. (n.s., no significance; ****, P < 0.0001; one-way ANOVA with Dunnett’s multiple comparisons test.) (**G**)HeLa cells were treated as in E, the medium was collected for ELISA analysis. The plot shows the relative fold change of IL8 secretion. Columns, mean; bars, ± S.D. of 3 independent experiments. (n.s., no significance; ***, P < 0.001; ****, P < 0.0001; One way ANOVA with Dunnett’s multiple comparisons test.)

**Table S1.** Primers for RT-PCR.

| ***WIPI2***  Forward: CCATCGTCAGCCTTAAAGCAC  Reverse: TCCAGGCATACTATCAGCCTC |
| --- |
| ***CUL4A***  Forward: ACCTCGCACAGATGTACCAG  Reverse: AGGTTGACGAACCGCTCATTC |
| ***CUL4B***  Forward: ACTCCTCCTTTACAACCCAGG  Reverse: TCTTCGCATCAAACCCTACAAAC |
| ***GAPDH***  Forward: TGTGGGCATCAATGGATTTGG  Reverse: ACACCATGTATTCCGGGTCAAT |
| ***IL1A***  Forward: TGGTAGTAGCAACCAACGGGA  Reverse: ACTTTGATTGAGGGCGTCATTC |
| ***IL6***  Forward: ACTCACCTCTTCAGAACGAATTG  Reverse: CCATCTTTGGAAGGTTCAGGTTG |
| ***IL8***  Forward: TTTTGCCAAGGAGTGCTAAAGA  Reverse: AACCCTCTGCACCCAGTTTTC |
| ***CCL3***  Forward: CGGCAGATTCCACAGAATTTC  Reverse: AGGTCGCTGACATATTTCTGG |
| ***TBP***  Forward: CCACTCACAGACTCTCACAAC  Reverse: CTGCGGTACAATCCCAGAACT |
